# Supplementary material for: ChromaFold predicts the 3D contact map from single-cell chromatin accessibility
Source: PubMed Central journal article supplement (PMC10402156; doi:10.1101/2023.07.27.550836), 2023-07-28
Supplement: NIHPP2023.07.27.550836v1-supplement-2.pdf [file NIHPP2023.07.27.550836v1-supplement-2.pdf]

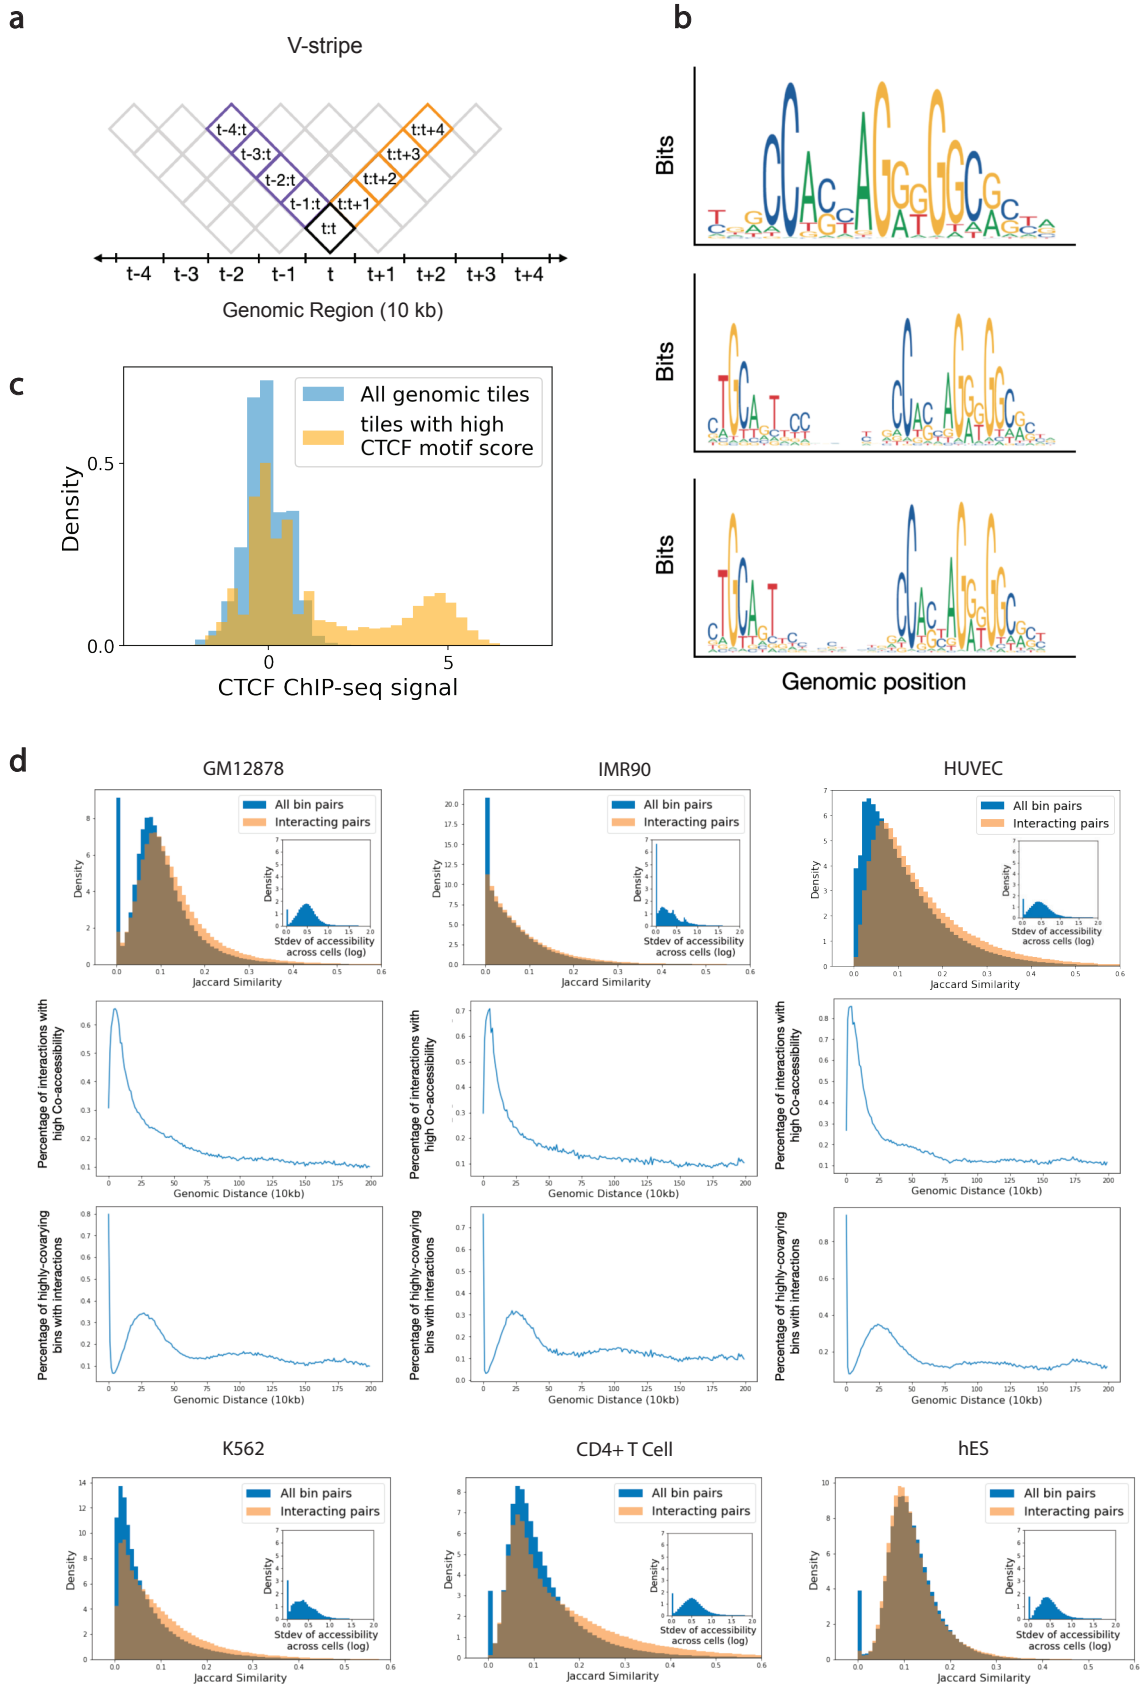

**Supplementary Figure 1. ChromaFold model choices and input analysis.** **a.** ChromaFold's prediction scheme for the chromatin interaction map. Each diamond  $t_i:t_j$  represents the interaction between genomic bins  $t_i$  and  $t_j$ . For each input centered around tile  $t$ , ChromaFold predicts the interaction between tile  $t$  and its neighboring bins within 2Mb. **b.** CTCF motif PWMs used for CTCF motif scoring. **c.** Histogram shows the distribution of CTCF ChIP-seq signal in genomic bins with top 0.1% CTCF motif score (yellow) and in all genomic bins (blue). **d.** Analysis of the extent of overlap between Hi-C interaction and Jaccard similarity in training cell types. (Top) Histogram show the distribution of Jaccard similarity between interacting bin pairs (top 10% HiC-DC+ Zscore; orange) and all tile pairs within a 2Mb distance (blue). The embedded histogram shows the variability of ATAC-seq accessibility across cells. (Middle) The line plot shows the percentage of interacting bin pairs with high Jaccard similarity (top 10%) at each genomic distance. (Bottom) The line plot shows the percentage of bins with high Jaccard similarity that are interacting at each genomic distance.

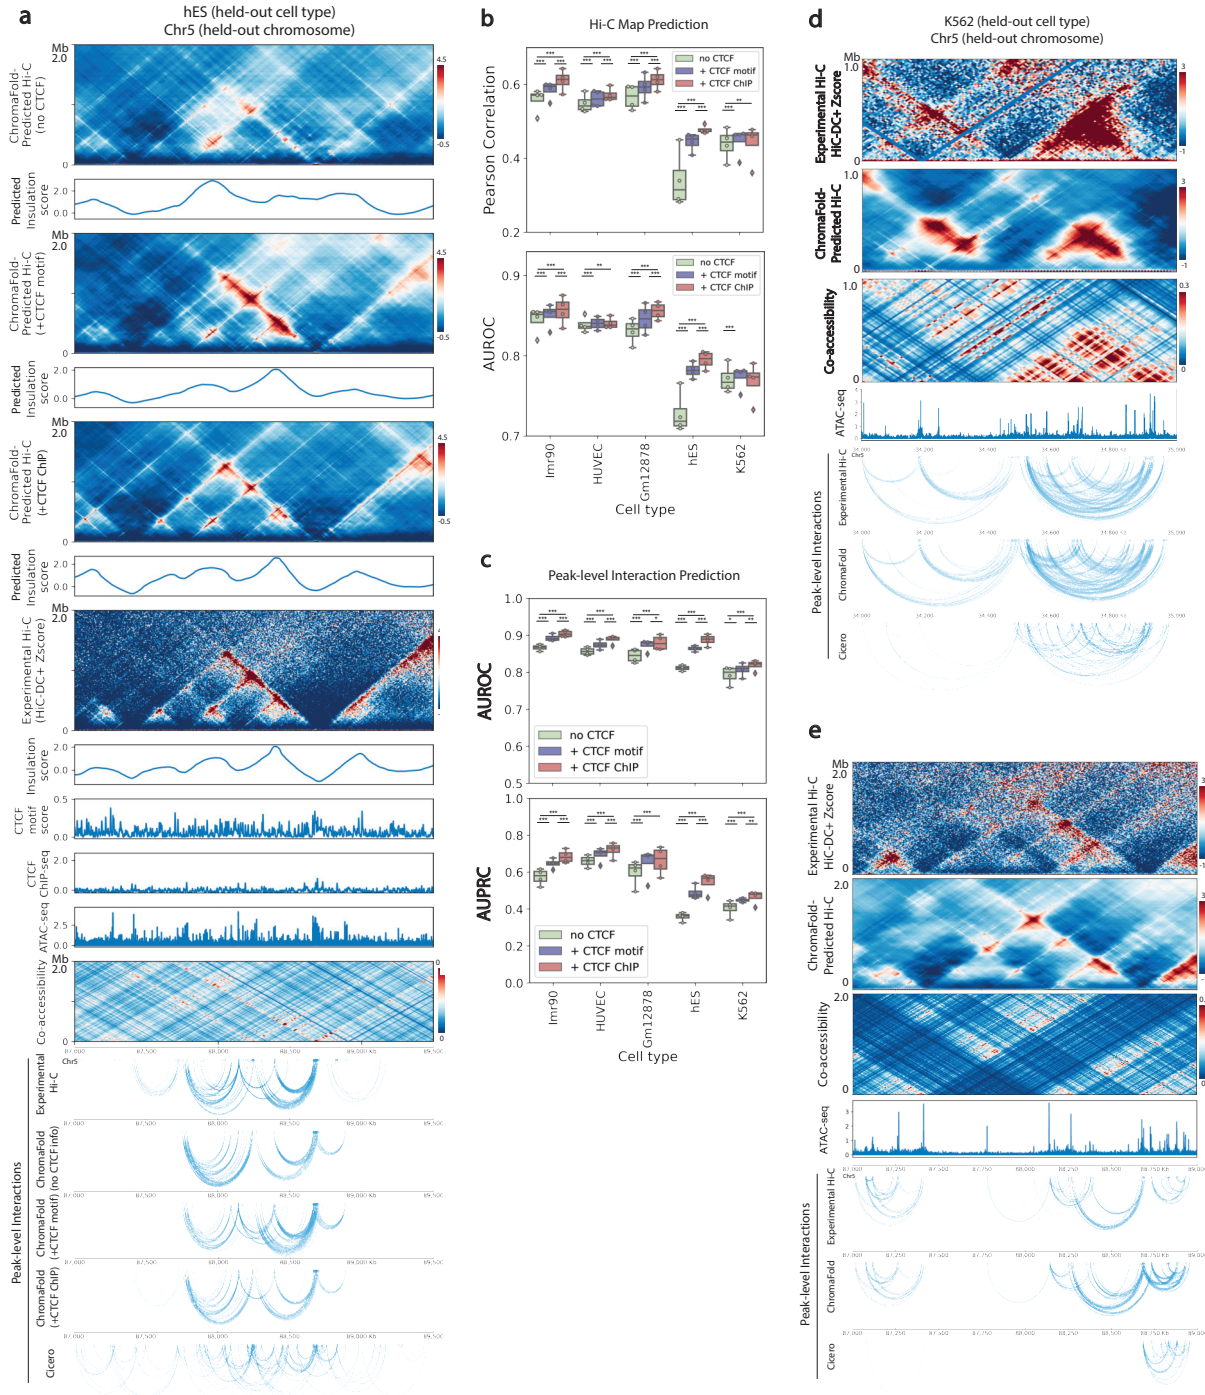

**Supplementary Figure 2. CTCF information is crucial for accurate prediction of Hi-C interactions.** **a.** Visualization of Hi-C contact maps, insulation scores and peak-level interactions predicted by ChromaFold using no CTCF information, CTCF motif score and CTCF ChIP-seq data as input in held-out cell type hESC on held-out chromosome 5. **b.** Box plots show (top) the averaged distance-stratified Pearson correlation between the experimental and predicted contact

map and (bottom) the averaged distance-stratified AUROC of significant interactions (top 10% in Z-score), per held-out chromosome. Paired t-test is performed on the distance-stratified person correlation across test chromosomes (P-value \*: <0.05, \*\*: < 0.01, \*\*\*: < 0.001). **c.** Box plots show the AUPRC (top) and AUROC (bottom) of significant peak-level interaction prediction per held-out chromosome. Statistical test is the same as above. **d, e.** Additional visualization of ChromaFold-predicted Hi-C contact map and significant peak-level interactions and Cicero-predicted peak-level interactions in held-out cell type K562 on held-out chromosomes.



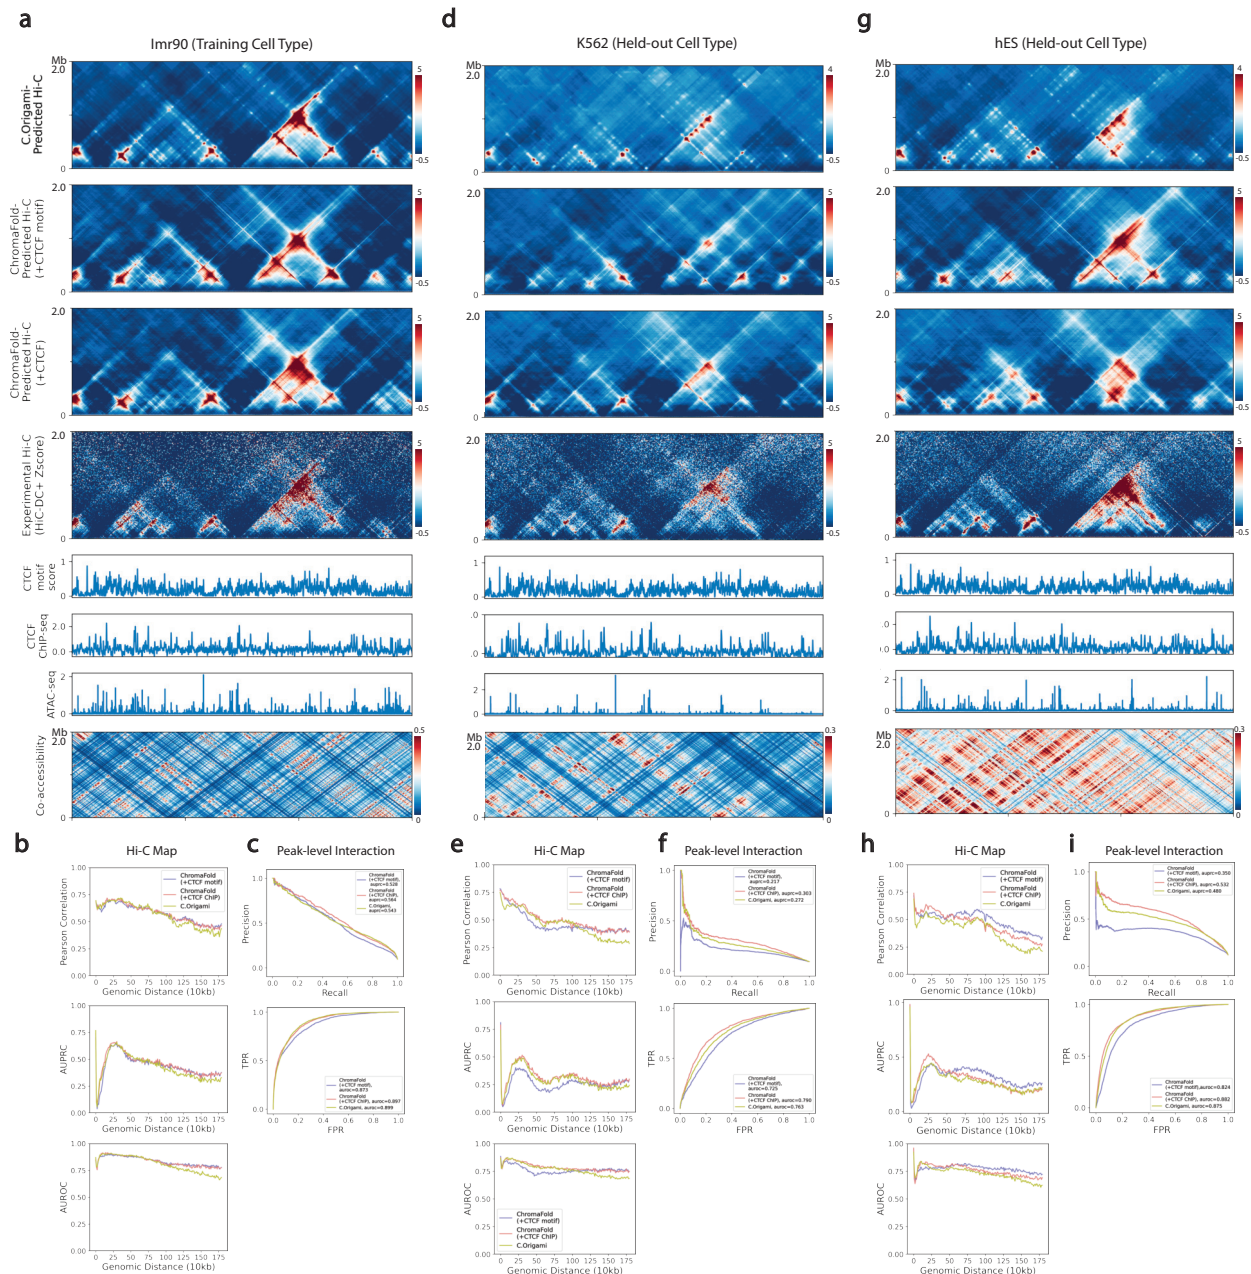

**Supplementary Figure 3. ChromaFold outperforms C.Origami at prediction of HiC-DC+ normalized contact maps in held-out cell types.** Visualization of C.Origami and ChromaFold predictions in training cell type IMR-90 (**a**, **b**, **c**), held-out cell type K562 (**d**, **e**, **f**) and hESC (**g**, **h**, **i**): HiC-DC+ normalized Hi-C contact maps (**a**, **d**, **g**); distance-stratified Pearson correlation for Hi-C contact map prediction, distance-stratified AUPRC and AUROC of significant interactions (top 10% in Z-score) (**b**, **e**, **h**); and PR and ROC curve for peak-level interaction prediction (**c**, **f**, **i**).

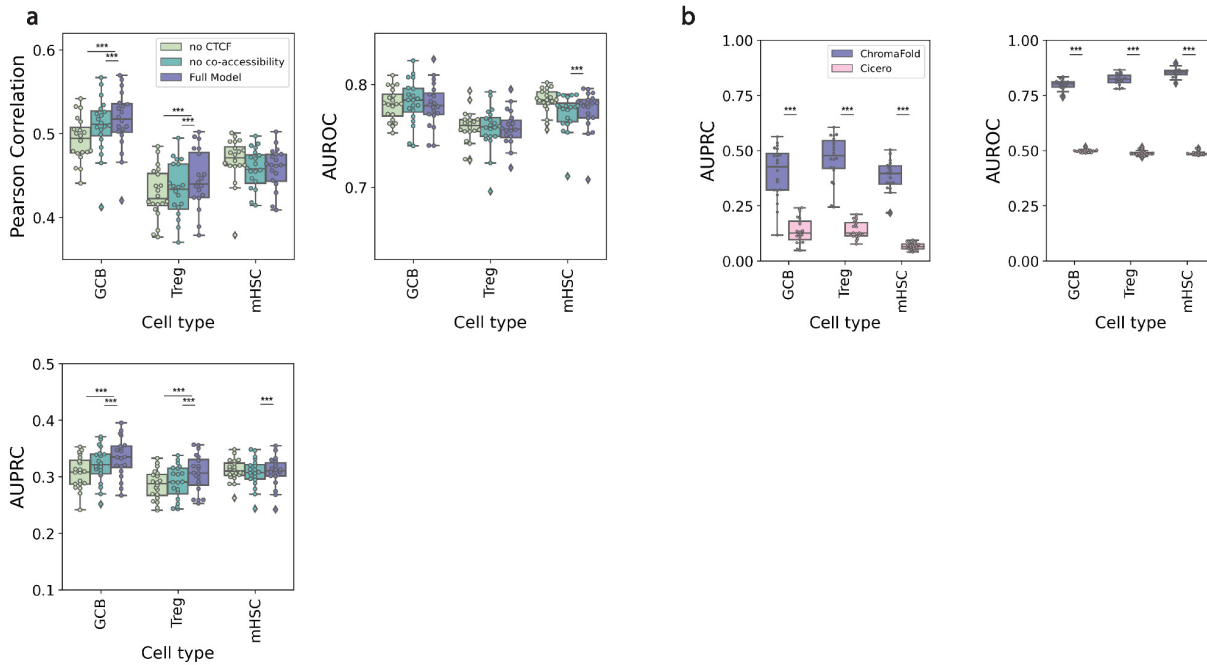

**Supplementary Figure 4. Quantitative evaluation and model comparison in mouse cell types.**

**a.** Comparison between ChromaFold model performance in the absence of CTCF motif score information and co-accessibility information. Box plots show the averaged distance-stratified Pearson correlation between the experimental and predicted contact map and the averaged distance-stratified AUPRC and AUROC of significant interactions (top 10% in Z-score), per chromosome. Paired t-test is performed on the distance-stratified person correlation across test chromosomes (P-value \*: <0.05, \*\*: < 0.01, \*\*\*: < 0.001). **b.** Comparison between ChromaFold and Cicero. Box plots show the AUPRC (top) and AUROC (bottom) of significant peak-level interaction prediction per held-out chromosome. Statistical test is the same as above.

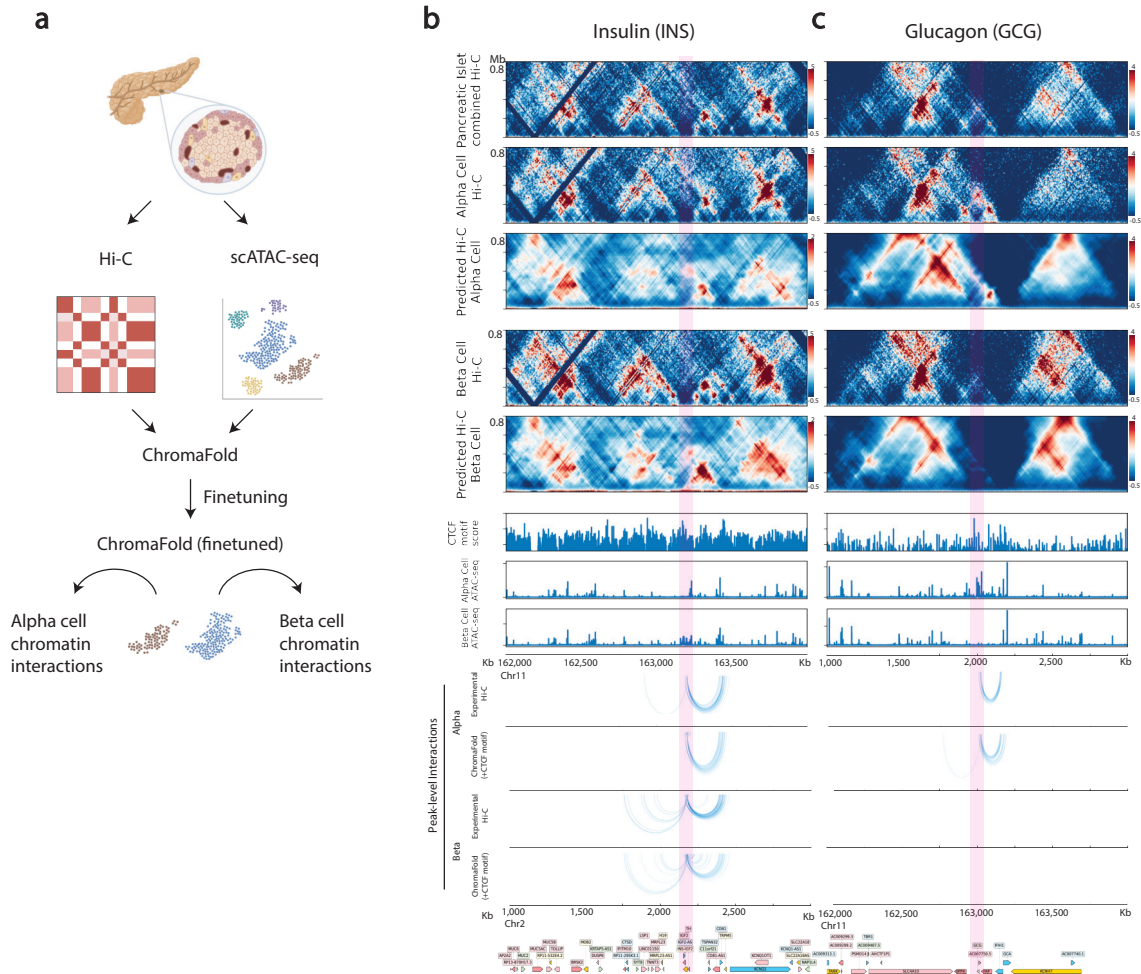

**Supplementary Figure 5. Deconvolution of pancreatic islet cell contact maps at additional loci. a.** Schematic of ChromaFold applied to the task of deconvoluting chromatin interactions in a complex tissue. **b, c.** Visualization of deconvolved contact maps (top) and peak-level interactions (bottom) in alpha cells and beta cells near the TSS of **(b)** glucagon (*GCG*), and **(c)** insulin (*INS*).
